# Supplementary material
Source: Springer Nature journal article supplement (https://edoc.mdc-berlin.de/id/eprint/26469/2/26469suppl.zip)

Uncropped images Figure 2C:

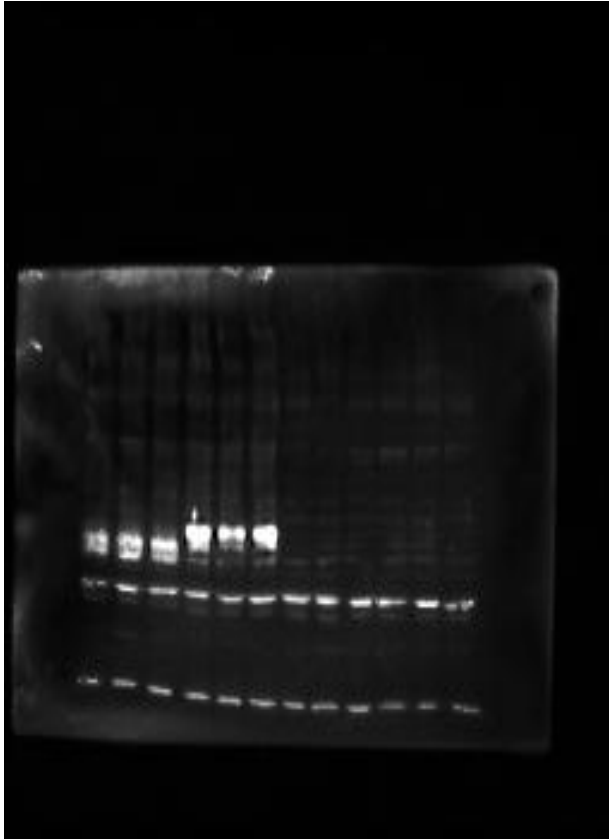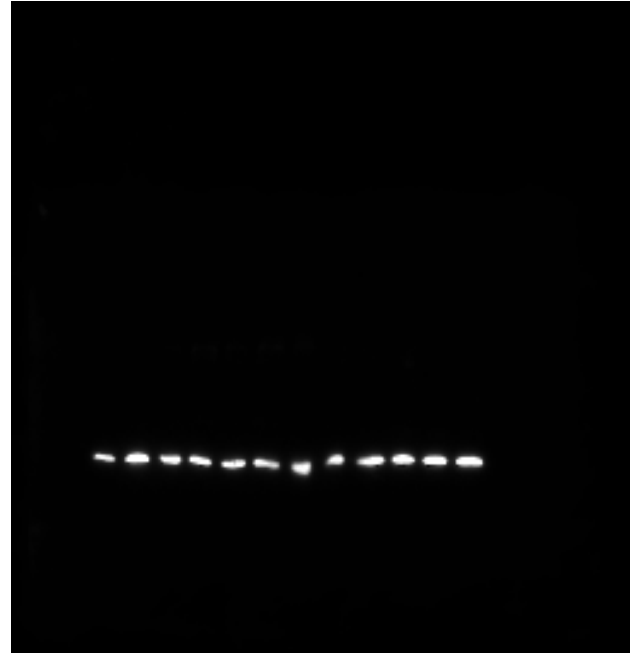

Uncropped images Figure 2H:

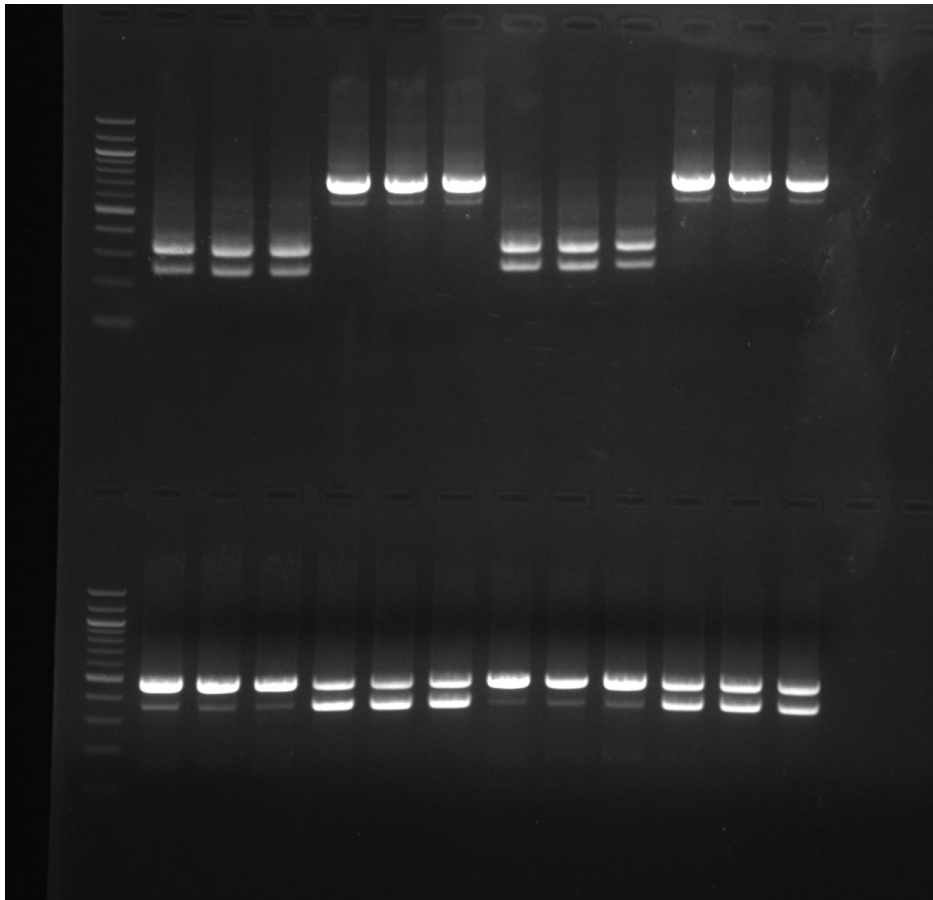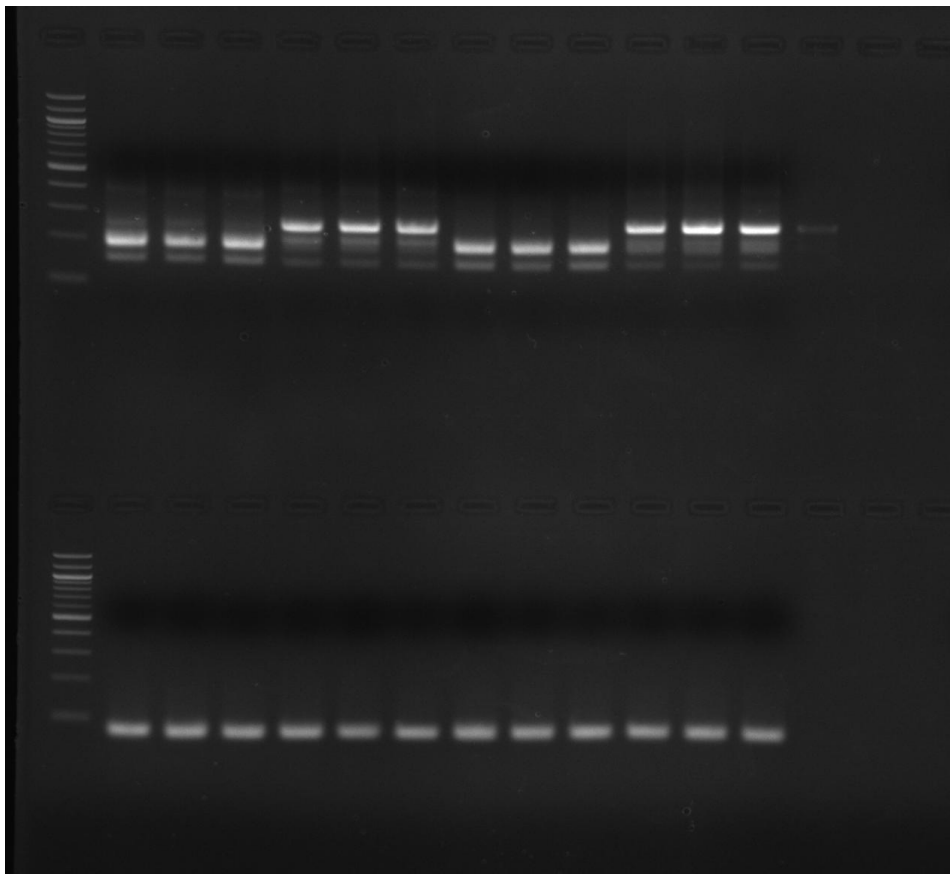

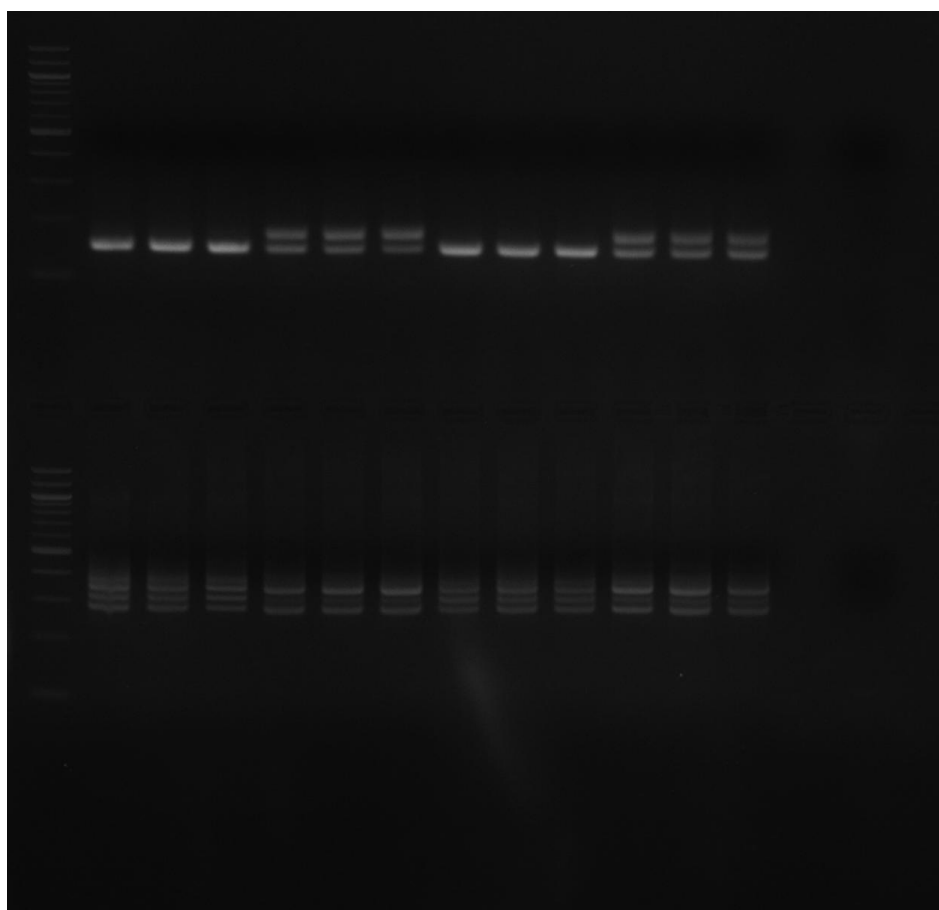

Supplement: MOESM5 [file 44161_2026_818_MOESM5_ESM.pdf › 44161_2026_818_MOESM5_ESM.pdf]

Uncropped images Figure 3B:

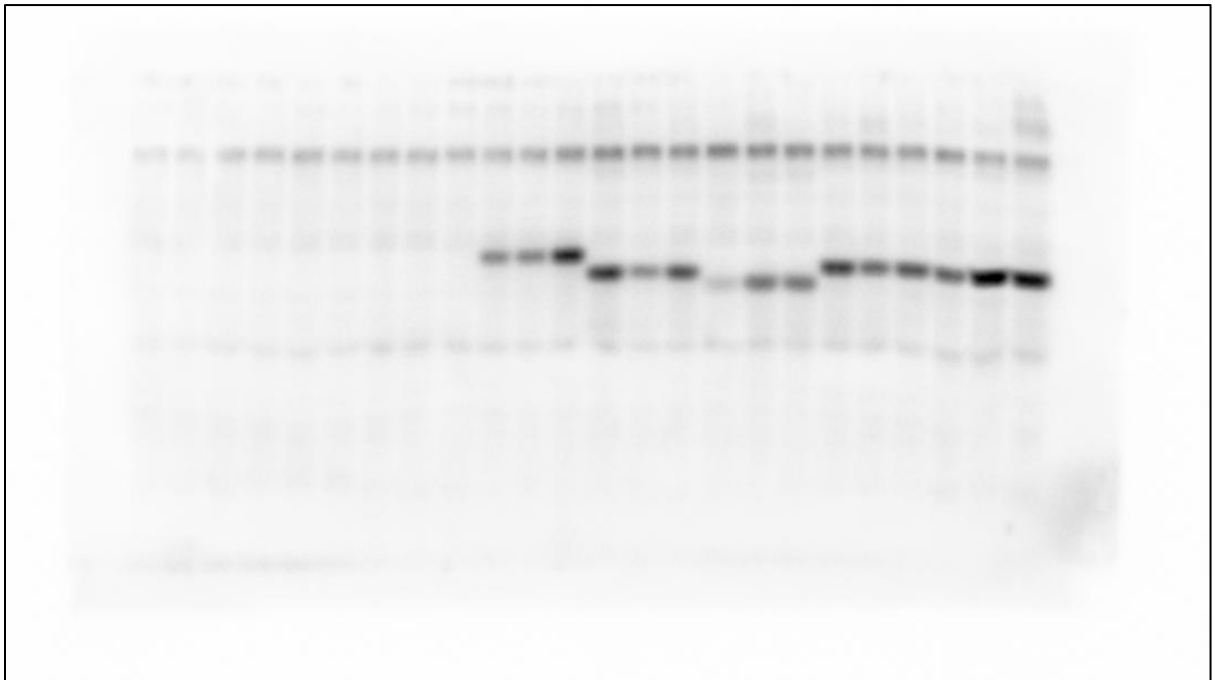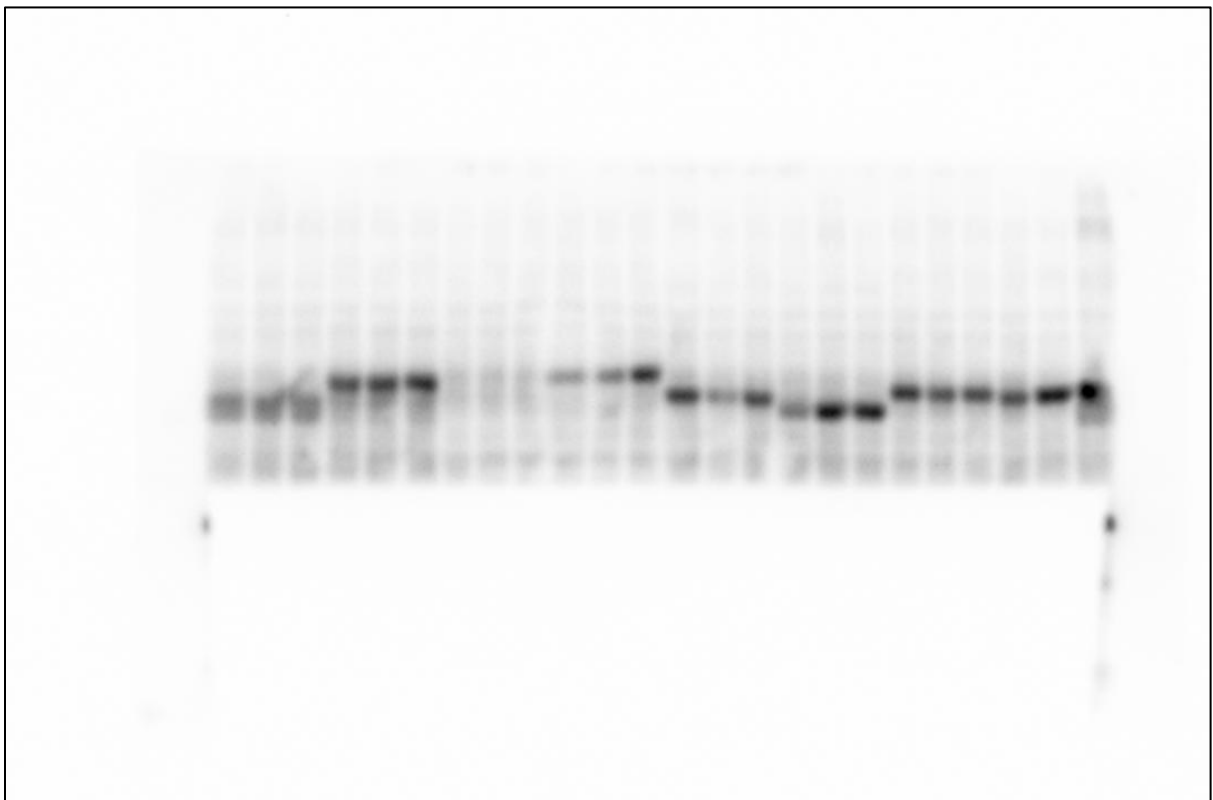

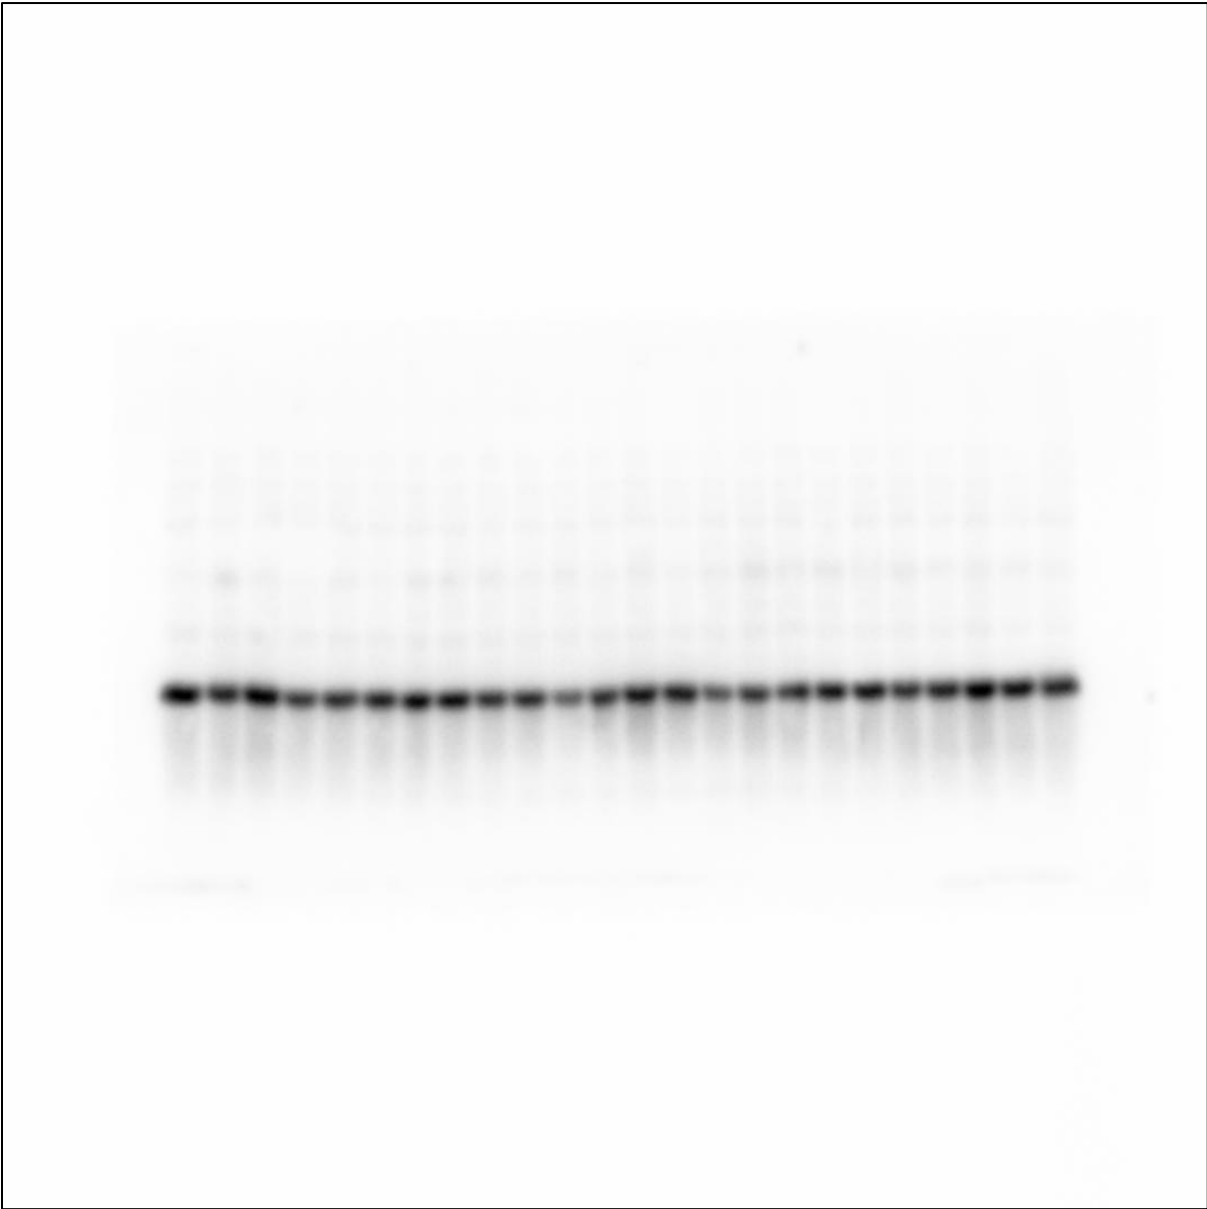

Supplement: MOESM6 [file 44161_2026_818_MOESM6_ESM.pdf › 44161_2026_818_MOESM6_ESM.pdf]

Uncropped images Extended Data Figure 4C:

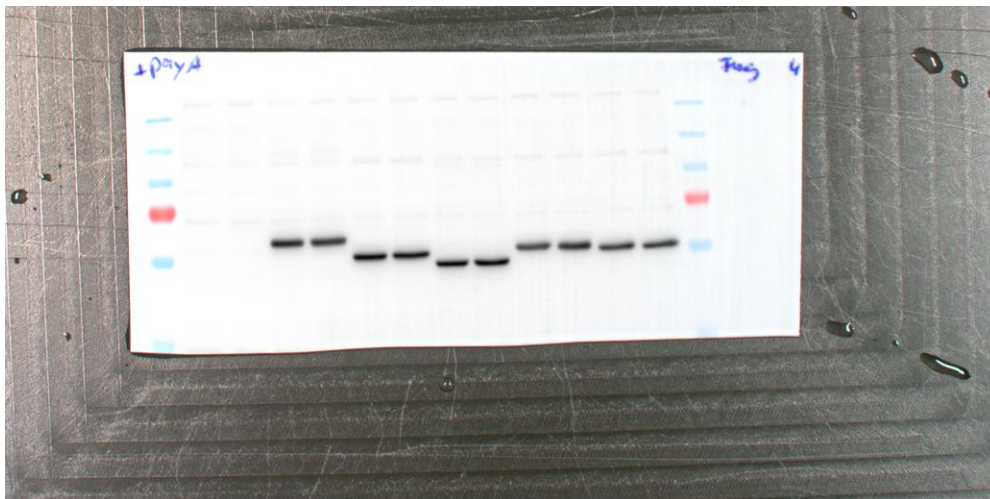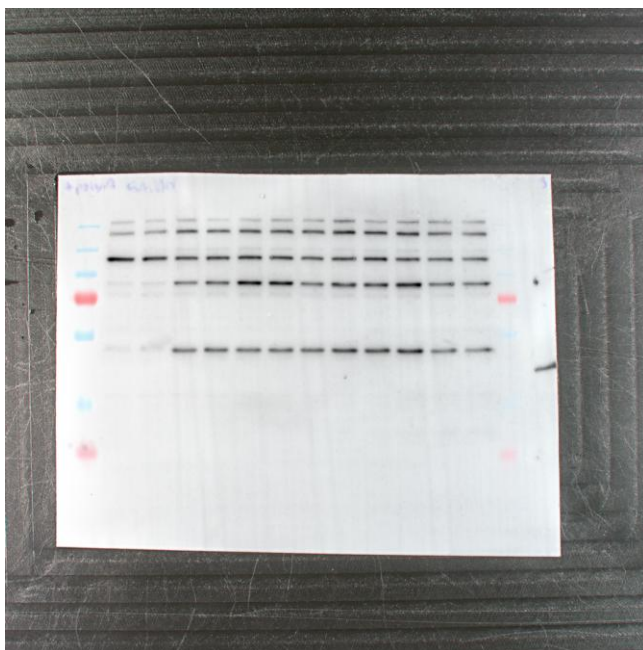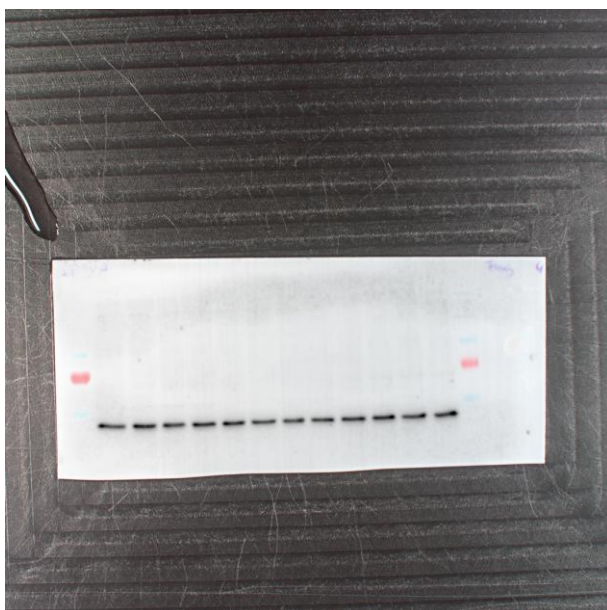

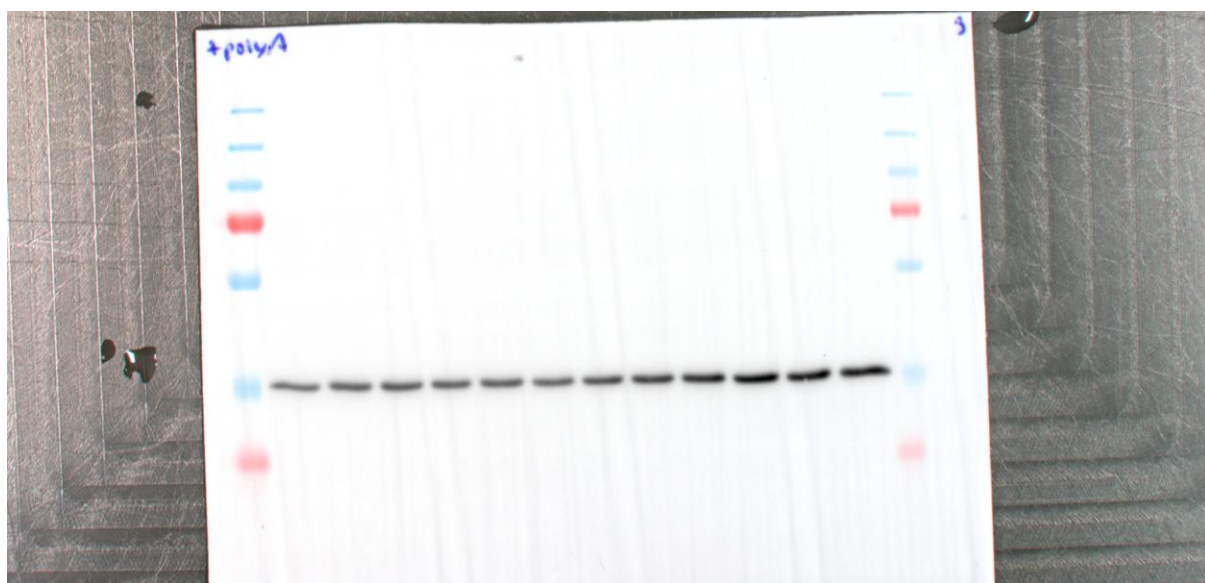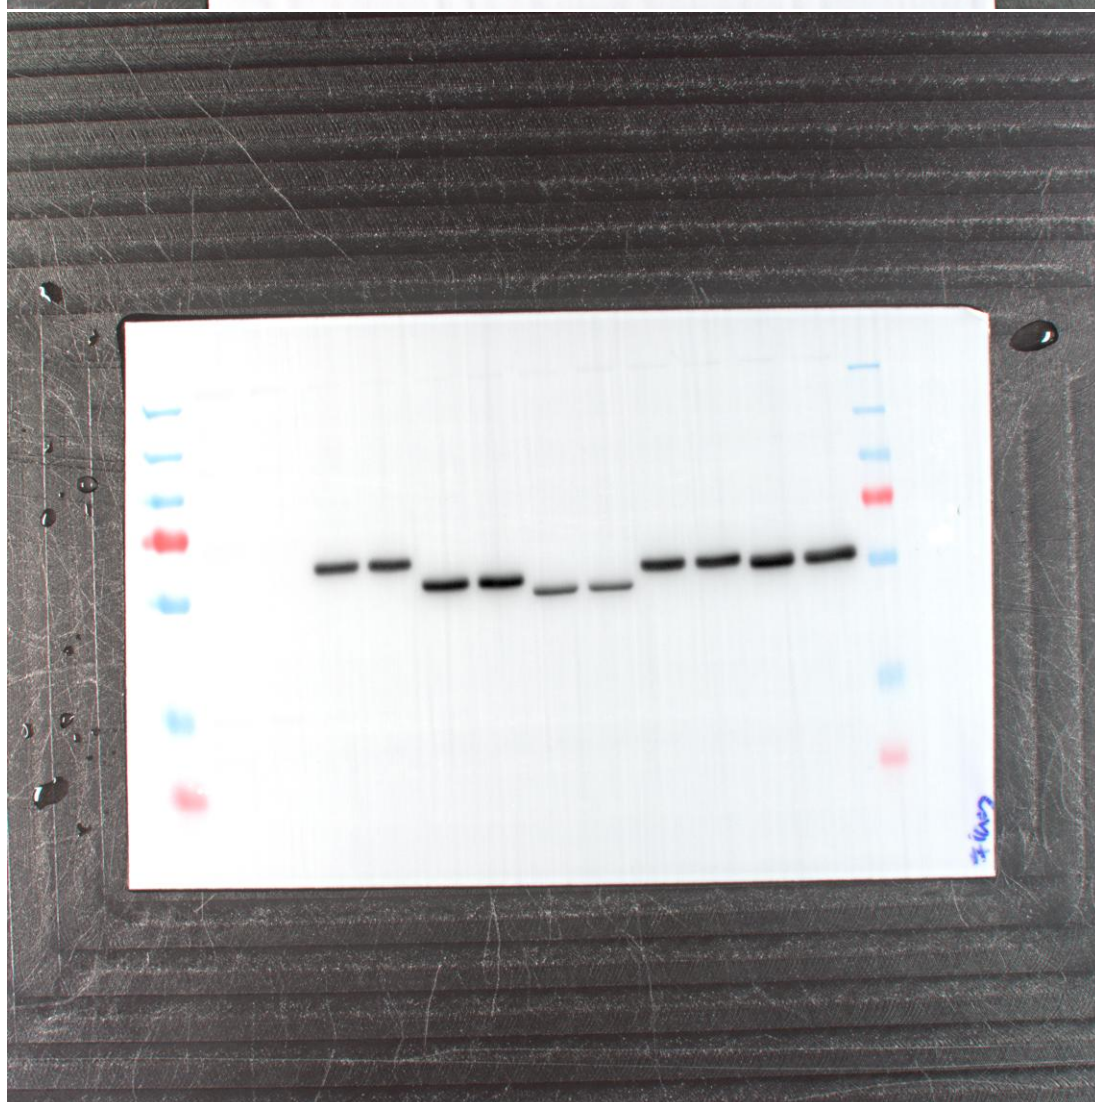



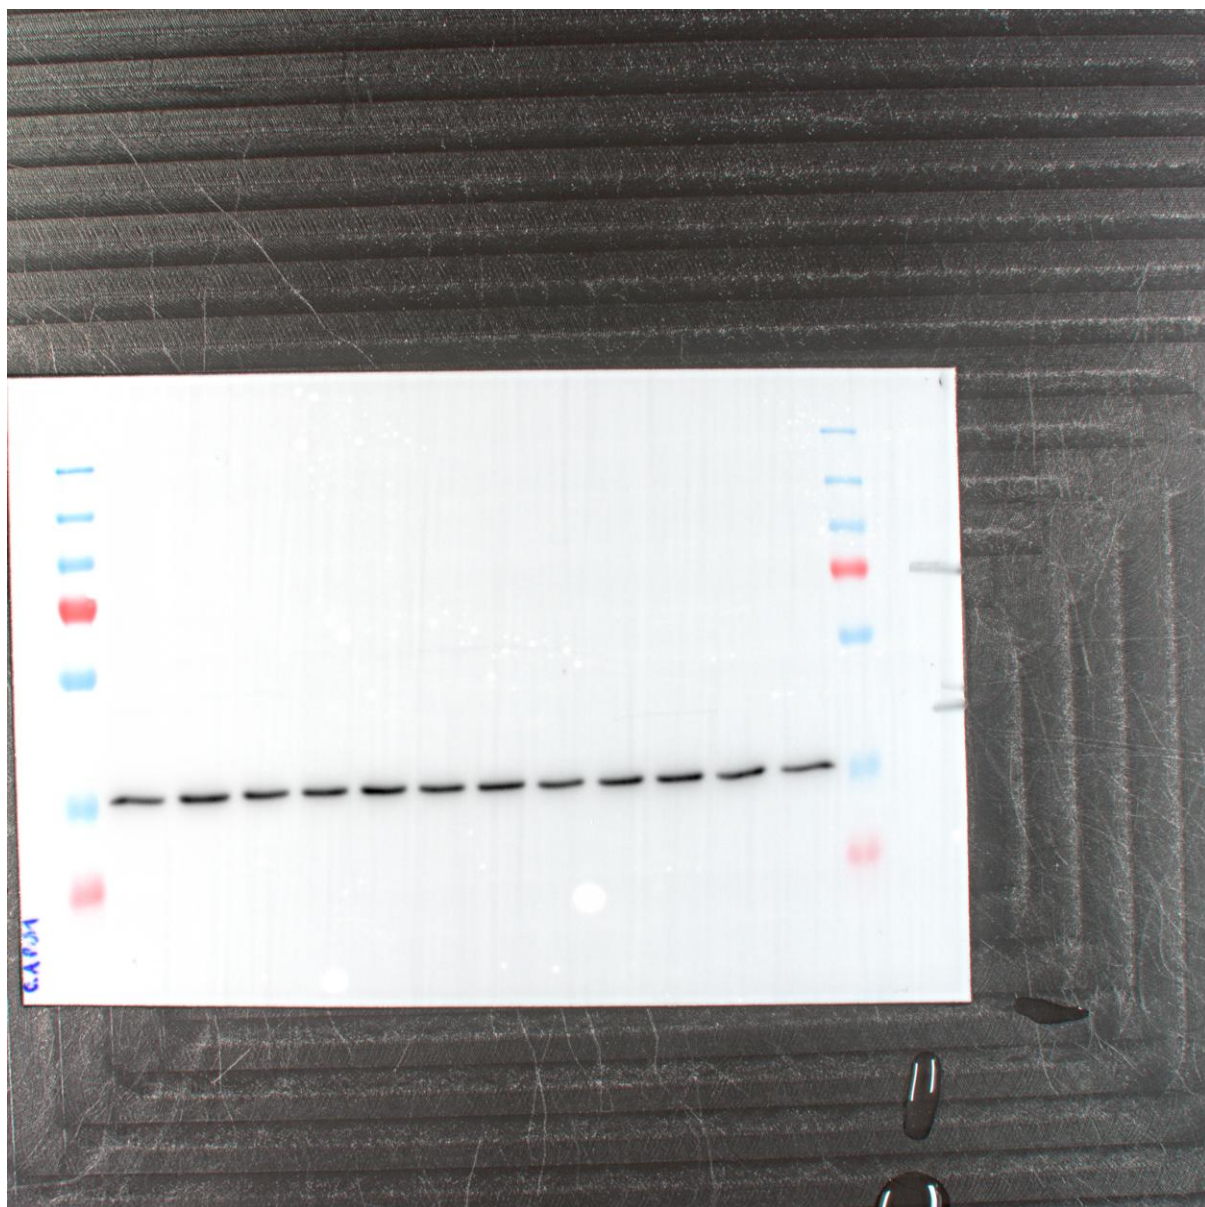

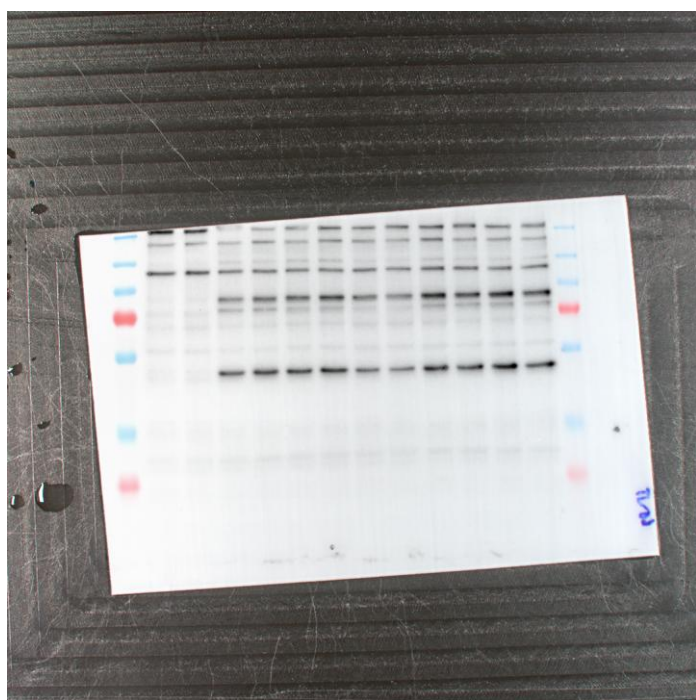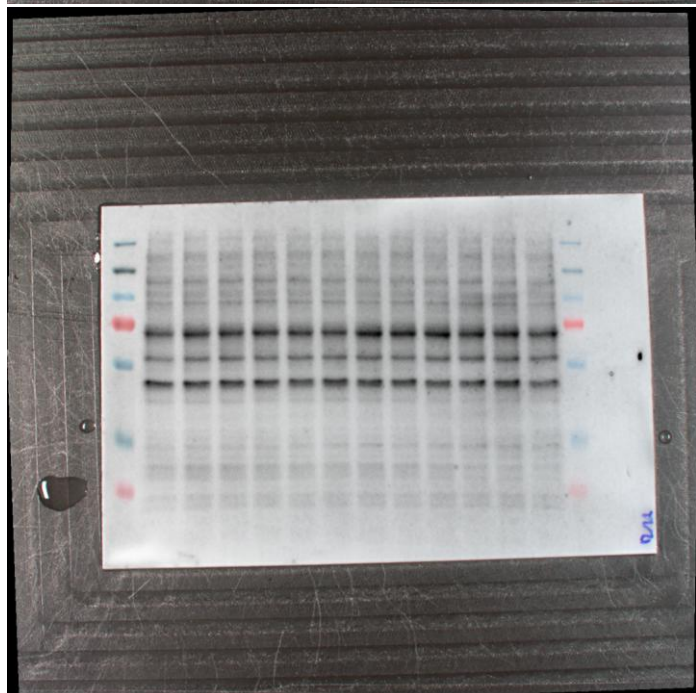

Supplement: MOESM7 [file 44161_2026_818_MOESM7_ESM.pdf › 44161_2026_818_MOESM7_ESM.pdf]

Uncropped images Extended Data Figure 5B:

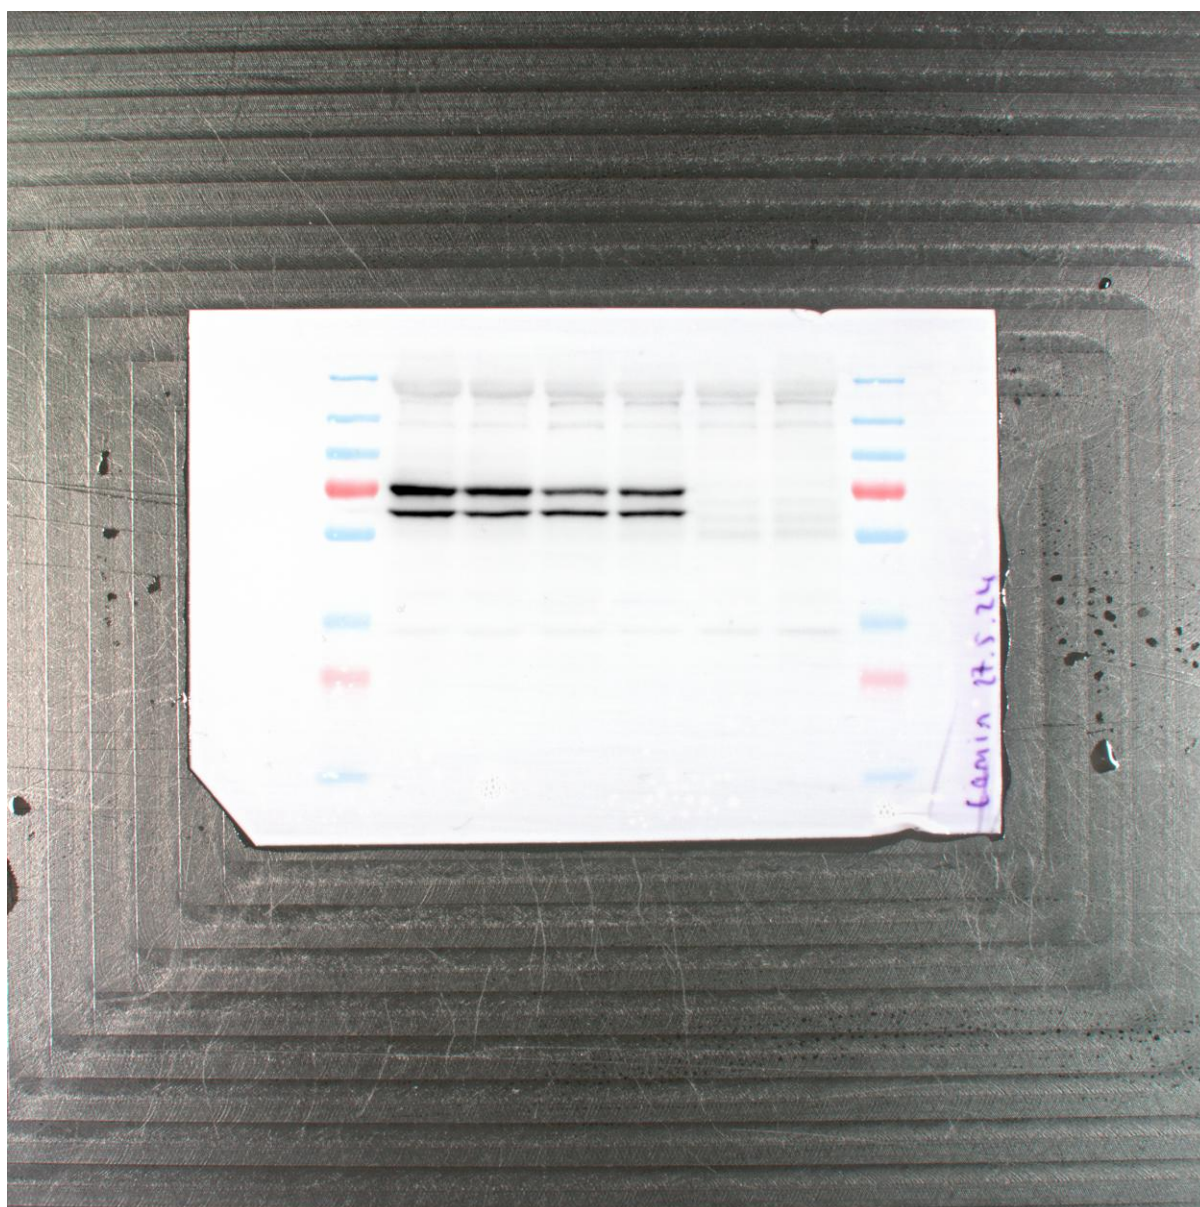

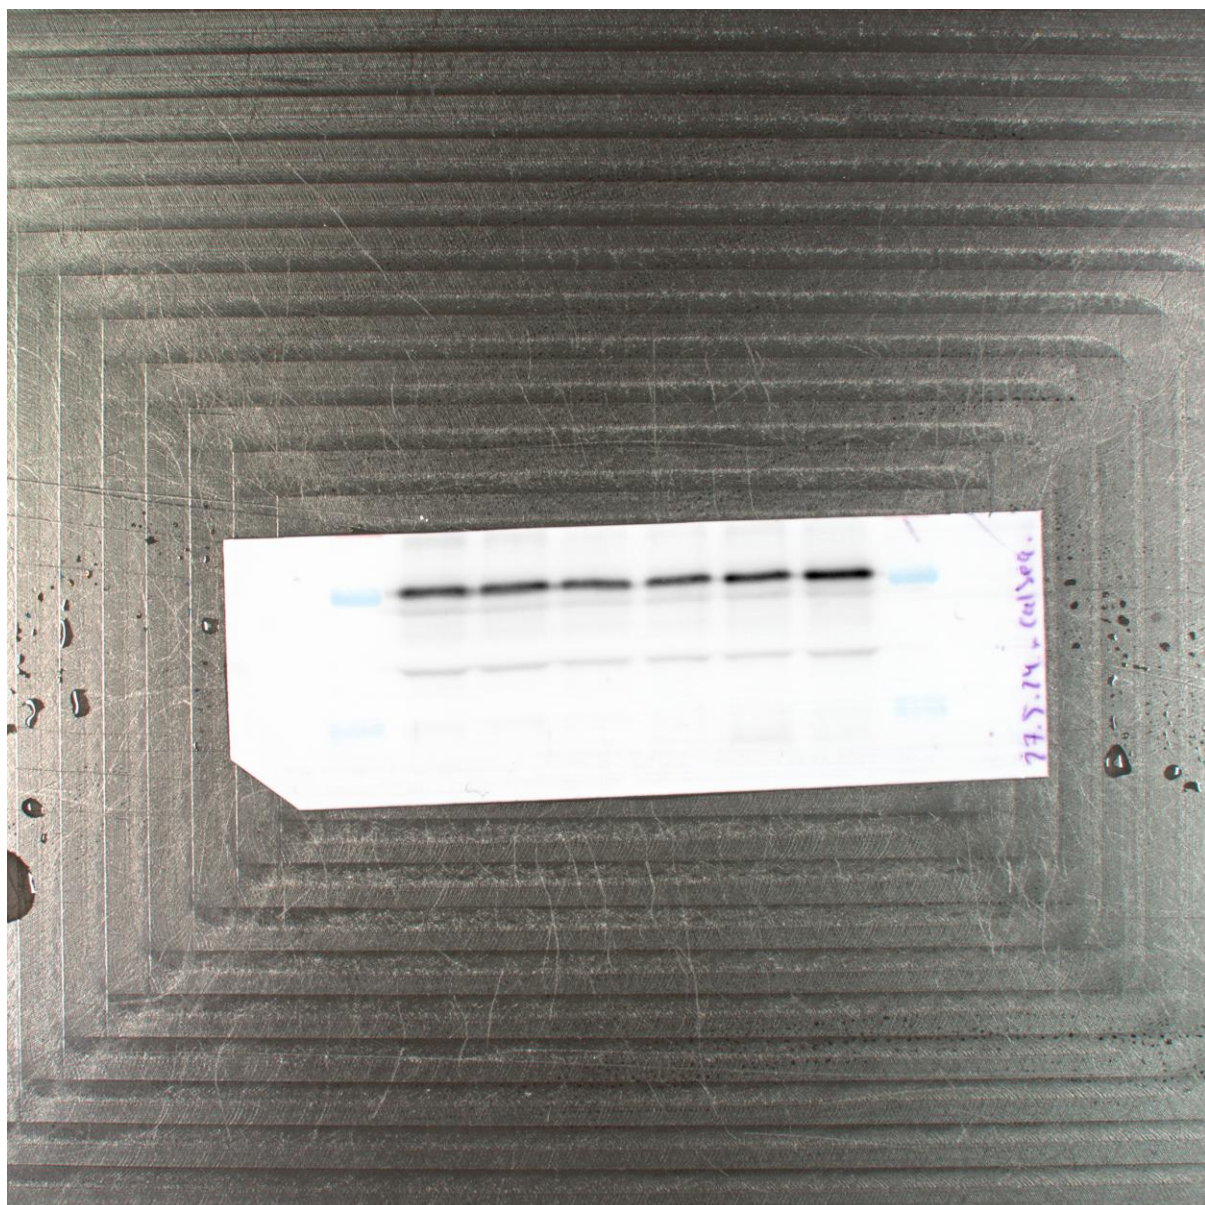



Uncropped images Extended Data Figure 5D:

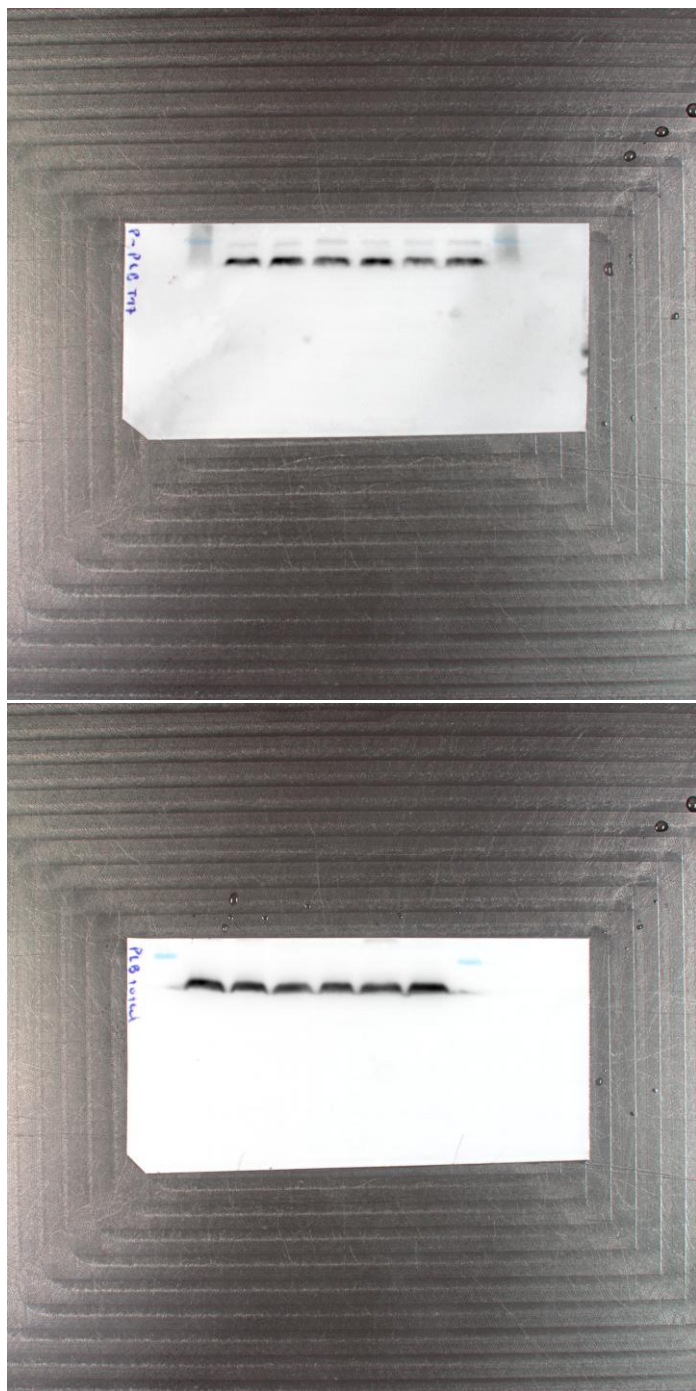

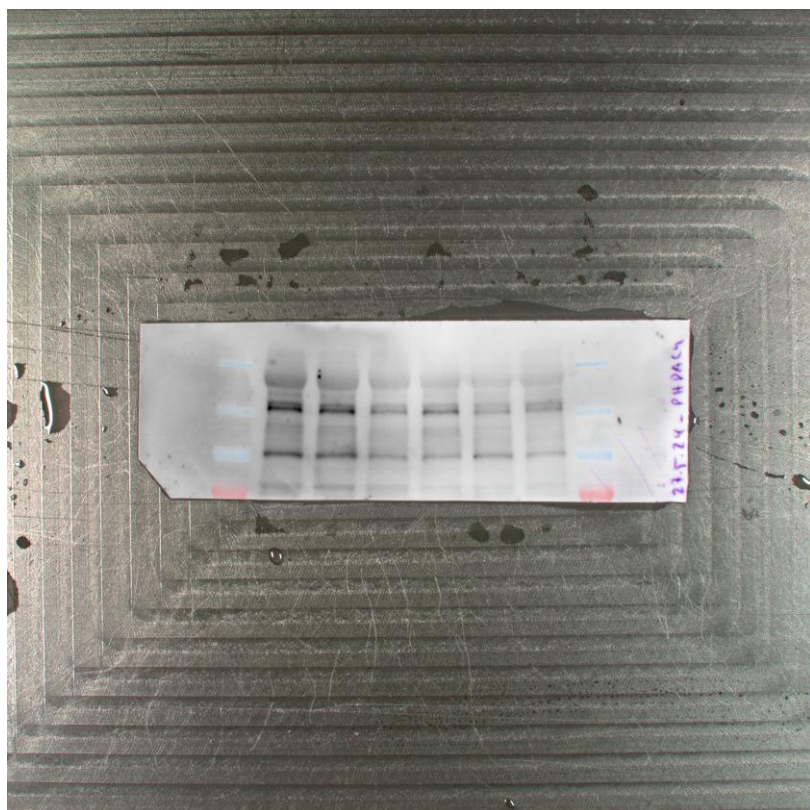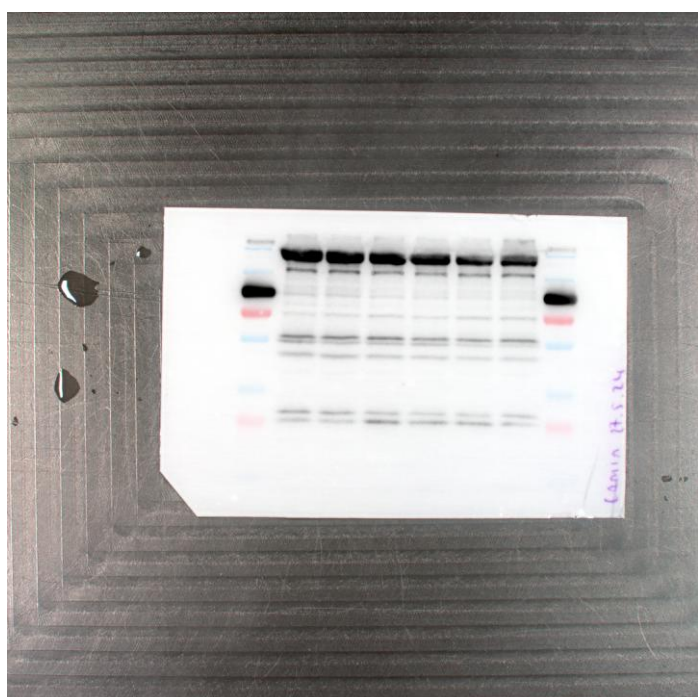



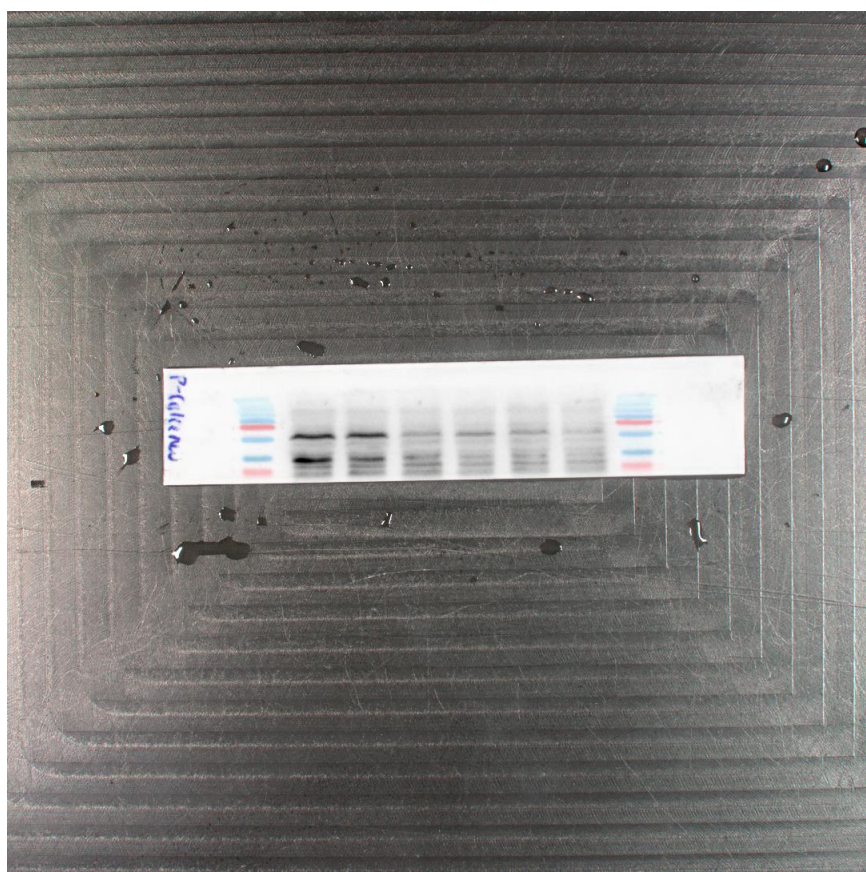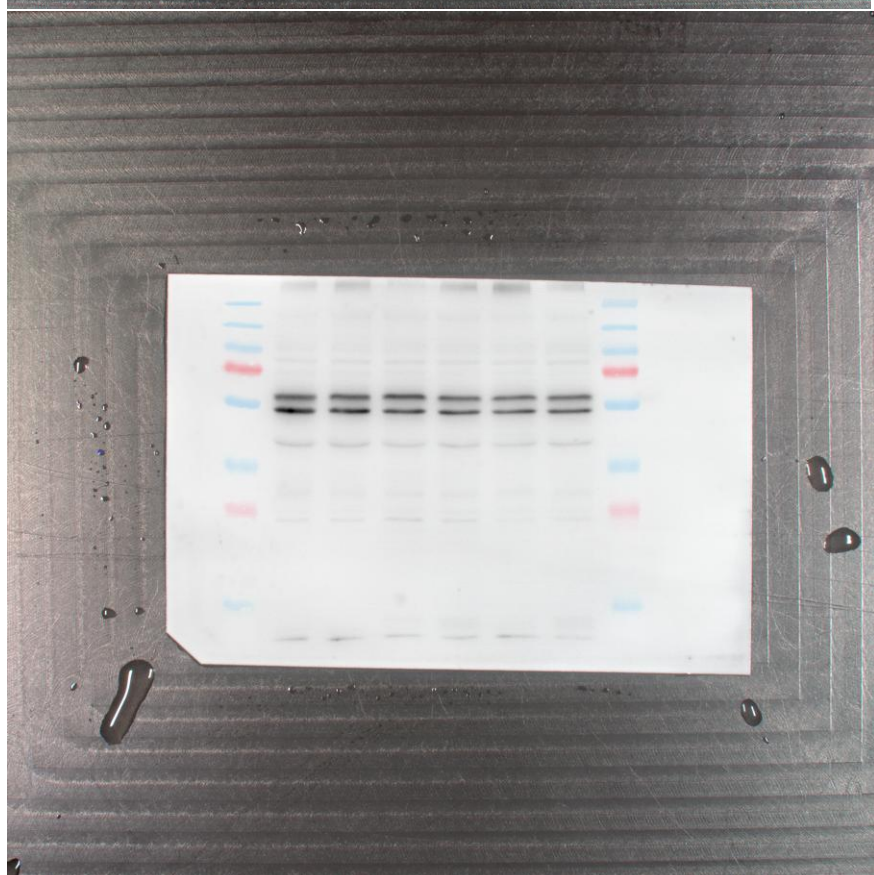

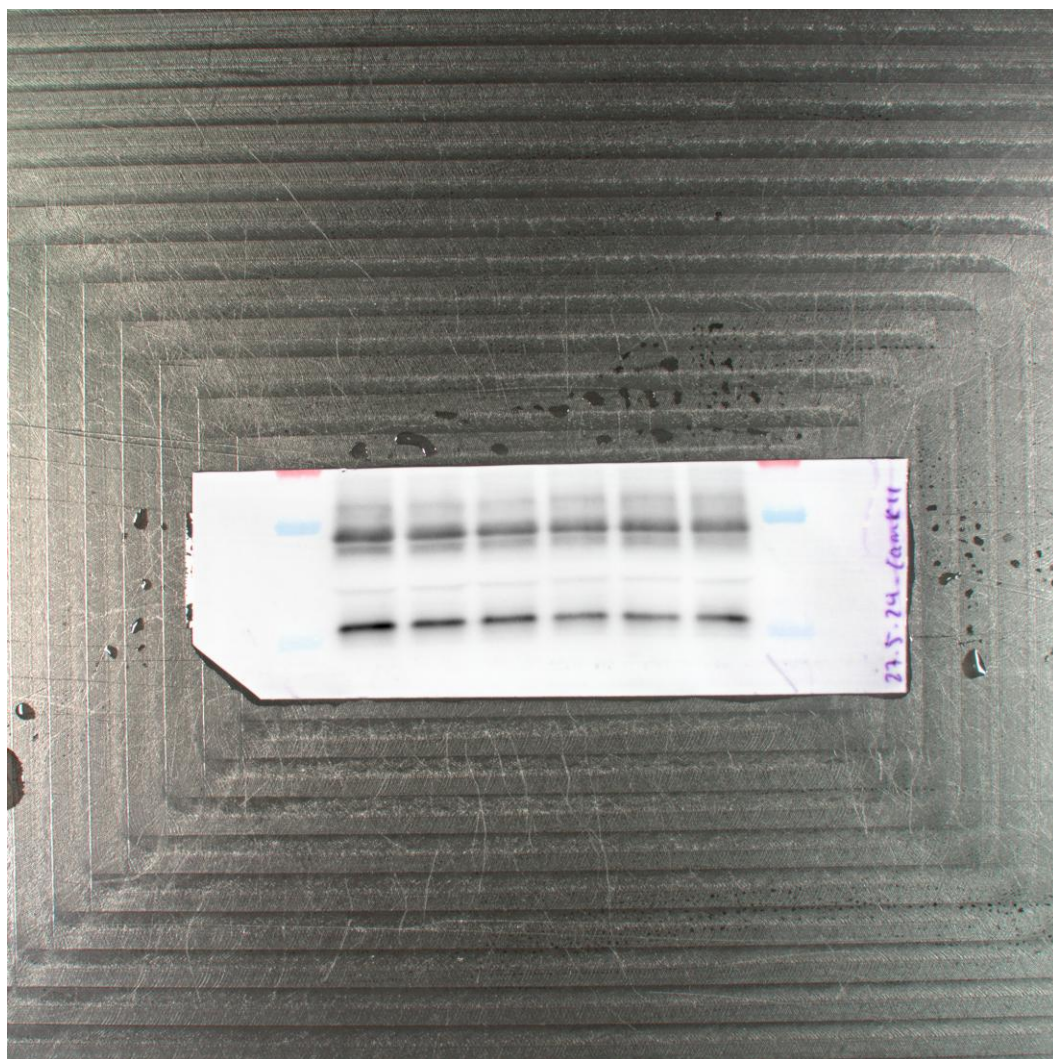





Supplement: MOESM8 [file 44161_2026_818_MOESM8_ESM.pdf › 44161_2026_818_MOESM8_ESM.pdf]
